# Supplementary material for: Deciphering Genetic Alterations of Taiwanese Patients with Pancreatic Adenocarcinoma through Targeted Sequencing
Source: MDPI journal article supplement (doi:10.3390/ijms23031579), 2022-01-29
Supplement: s1 [file s1]

## Supplementary materials

### Legends for Supplementary Figures

Supplementary Figure S1. Variant impact heat map of five Taiwanese PAC samples assayed with the OCP. Variant impacts were color-coded using the associated score values. Default scores are unknown: 0, synonymous: 1, missense: 2, non-frameshift block substitution: 3, non-frameshift insertion: 4, non-frameshift deletion: 4, nonsense: 5, stop-loss: 6, frameshift block substitution: 7, frameshift insertion: 7, frameshift deletion: 7, and splice variant: 8 (PAC: pancreatic adenocarcinoma, OCP: Oncomine Comprehensive Panel).

Supplementary Figure S2. Variant impact heat map of mucinous PAC (left) and PAC with pancreatic intraepithelial neoplasm precursor (right) samples assayed with the CHP. Variant impacts were color-coded using the associated score values. Default scores are unknown: 0, synonymous: 1, missense: 2, non-frameshift block substitution: 3, non-frameshift insertion: 4, non-frameshift deletion: 4, nonsense: 5, stop-loss: 6, frameshift block substitution: 7, frameshift insertion: 7, frameshift deletion: 7, and splice variant: 8 (PAC: pancreatic adenocarcinoma, Mucin: PAC with mucinous precursor, PIN: PAC with pancreatic intraepithelial neoplasm precursor, CHP: Cancer Hotspot Panel).

Supplementary Figure S3. OncoPrinter of 176 TCGA PAC samples with genes ordered as in Figure 3 (TCGA: The Cancer Genome Atlas, PAC: pancreatic adenocarcinoma).

Supplementary Figure S4. OncoPrinter of 176 TCGA PAC samples with genes ordered as in Figure 4; germline mutations and alterations of unknown significance are excluded (TCGA: The Cancer Genome Atlas, PAC: pancreatic adenocarcinoma).

# Supplementary Tables

Supplementary Table S1. PAC samples (X-axis) assayed by the CHP tabulates with mutant genes (Y-axis), with (top) and without (bottom) weighted by the number of called variants (PAC: pancreatic adenocarcinoma, CHP: Cancer Hotspot Panel).

|         | P1 | P13 | P14 | P15 | P18 | P20 | P22 | P27 | P29 | P32 | P33 | P35 | P39 | P40 | P41 | P43 | P44 | P45 | P46 | P48 | P50 | P53 | P55 | P56 | P57 | P58 | P6 | P60 | P64 | P65 | P66 | P68 | P8 | P9 |
|---------|----|-----|-----|-----|-----|-----|-----|-----|-----|-----|-----|-----|-----|-----|-----|-----|-----|-----|-----|-----|-----|-----|-----|-----|-----|-----|----|-----|-----|-----|-----|-----|----|----|
| CDKN2A  |    |     |     |     |     |     |     |     |     |     |     |     |     |     |     |     |     |     |     |     |     | 1   |     |     |     |     |    |     |     |     | 1   |     |    |    |
| CTNNB1  |    |     |     |     |     |     |     |     |     |     |     |     |     | 1   |     |     |     |     |     | 1   |     |     |     |     |     |     |    |     |     |     |     |     |    |    |
| EGFR    |    |     |     |     |     |     |     |     |     |     |     |     |     |     |     |     |     |     |     |     | 1   |     | 1   |     |     |     |    |     |     |     |     |     |    |    |
| GNAS    |    |     |     |     |     | 2   |     |     |     |     |     |     |     |     | 2   |     |     |     |     |     |     |     |     |     |     |     |    |     |     |     |     |     |    |    |
| HRAS    |    |     |     |     |     |     |     |     |     |     |     |     | 1   |     |     |     |     |     |     |     |     |     |     |     |     |     |    |     |     |     |     |     |    |    |
| IDH1    |    |     |     |     |     |     |     |     |     |     |     |     |     |     |     |     |     |     |     |     | 1   |     |     |     |     |     |    |     |     |     | 1   |     |    |    |
| KIT     |    |     | 1   |     |     |     |     |     |     |     |     |     | 1   |     |     |     |     |     |     |     | 1   |     | 1   |     |     |     |    |     |     |     |     |     | 1  | 1  |
| KRAS    | 1  | 1   | 1   | 1   | 1   | 1   |     | 1   | 1   |     | 1   |     | 1   |     |     | 1   |     | 1   | 1   | 1   |     | 1   | 1   | 1   | 1   | 1   |    | 1   |     |     | 1   | 1   | 1  |    |
| MET     |    |     |     | 1   |     |     |     |     |     |     |     |     |     |     |     | 1   |     |     |     | 1   |     |     |     | 1   |     |     |    |     |     |     |     |     |    |    |
| PDGFRA  |    |     | 1   |     |     |     | 1   |     |     | 1   | 1   | 1   |     |     | 1   |     |     | 1   |     |     |     |     |     |     |     | 1   |    |     |     |     | 1   | 1   |    |    |
| PTEN    |    |     | 1   |     |     | 1   |     |     |     |     |     |     |     |     |     |     |     |     |     |     |     |     |     |     | 1   |     |    |     |     |     |     | 3   |    |    |
| SMARCB1 | 1  |     |     |     |     |     | 1   |     | 1   |     |     |     |     |     | 1   |     |     |     |     |     |     |     | 1   |     |     |     |    |     |     |     |     |     | 1  |    |
| SMO     |    |     |     |     |     |     |     |     |     |     |     |     |     |     |     |     |     |     |     |     |     |     |     |     |     |     |    |     |     |     |     |     |    | 1  |
| STK11   |    |     |     |     |     | 1   |     |     |     |     |     |     |     |     | 1   |     |     |     |     |     |     |     |     |     |     |     |    |     |     |     |     |     |    |    |
| TP53    |    | 2   | 2   | 5   | 2   |     |     | 4   | 4   |     | 1   |     |     |     |     |     |     |     |     |     |     |     |     |     | 2   |     | 1  |     | 1   |     |     |     | 5  |    |

|         | P1 | P13 | P14 | P15 | P18 | P20 | P22 | P27 | P29 | P32 | P33 | P35 | P39 | P40 | P41 | P43 | P44 | P45 | P46 | P48 | P50 | P53 | P55 | P56 | P57 | P58 | P6 | P60 | P64 | P65 | P66 | P68 | P8 | P9 |
|---------|----|-----|-----|-----|-----|-----|-----|-----|-----|-----|-----|-----|-----|-----|-----|-----|-----|-----|-----|-----|-----|-----|-----|-----|-----|-----|----|-----|-----|-----|-----|-----|----|----|
| CDKN2A  |    |     |     |     |     |     |     |     |     |     |     |     |     |     |     |     |     |     |     |     |     | 1   |     |     |     |     |    |     |     | 1   |     |     |    |    |
| CTNNB1  |    |     |     |     |     |     |     |     |     |     |     |     |     | 1   |     |     |     |     |     | 1   |     |     |     |     |     |     |    |     |     |     |     |     |    |    |
| EGFR    |    |     |     |     |     |     |     |     |     |     |     |     |     |     |     |     |     |     |     |     | 1   |     | 1   |     |     |     |    |     |     |     |     |     |    |    |
| GNAS    |    |     |     |     |     | 1   |     |     |     |     |     |     |     |     | 1   |     |     |     |     |     |     |     |     |     |     |     |    |     |     |     |     |     |    |    |
| HRAS    |    |     |     |     |     |     |     |     |     |     |     |     | 1   |     |     |     |     |     |     |     |     |     |     |     |     |     |    |     |     |     |     |     |    |    |
| IDH1    |    |     |     |     |     |     |     |     |     |     |     |     |     |     |     |     |     |     |     |     | 1   |     |     |     |     |     |    |     |     |     | 1   |     |    |    |
| KIT     |    |     | 1   |     |     |     |     |     |     |     |     |     | 1   |     |     |     |     |     |     |     | 1   |     | 1   |     |     |     |    |     |     |     |     |     | 1  | 1  |
| KRAS    | 1  | 1   | 1   | 1   | 1   | 1   |     | 1   | 1   |     | 1   |     | 1   |     |     | 1   |     | 1   | 1   | 1   |     | 1   | 1   | 1   | 1   | 1   |    | 1   |     |     | 1   | 1   | 1  |    |
| MET     |    |     |     | 1   |     |     |     |     |     |     |     |     |     |     |     | 1   |     |     |     | 1   |     |     |     | 1   |     |     |    |     |     |     |     |     |    |    |
| PDGFRA  |    |     | 1   |     |     |     | 1   |     |     | 1   | 1   | 1   |     |     | 1   |     |     | 1   |     |     |     |     |     |     |     | 1   |    |     |     |     | 1   | 1   |    |    |
| PTEN    |    |     | 1   |     |     | 1   |     |     |     |     |     |     |     |     |     |     |     |     |     |     |     |     |     |     | 1   |     |    |     |     |     |     | 1   |    |    |
| SMARCB1 | 1  |     |     |     |     |     | 1   |     | 1   |     |     |     |     |     | 1   |     |     |     |     |     |     |     | 1   |     |     |     |    |     |     |     |     |     | 1  |    |
| SMO     |    |     |     |     |     |     |     |     |     |     |     |     |     |     |     |     |     |     |     |     |     |     |     |     |     |     |    |     |     |     |     |     |    | 1  |
| STK11   |    |     |     |     |     | 1   |     |     |     |     |     |     |     |     | 1   |     |     |     |     |     |     |     |     |     |     |     |    |     |     |     |     |     |    |    |
| TP53    |    | 1   | 1   | 1   | 1   |     |     | 1   | 1   |     | 1   |     |     |     |     |     |     |     |     |     |     |     |     |     | 1   |     | 1  |     | 1   |     |     |     | 1  |    |

Supplementary Table S2. Recurrent COSMIC IDs from Taiwanese PAC assayed with the CHP (PAC: pancreatic adenocarcinoma, CHP: Cancer Hotspot Panel).

| COSMIC ID  | Called frequency | Gene           | FATHMM* prediction       |
|------------|------------------|----------------|--------------------------|
| COSM22413  | 10               | <i>PDGFRA</i>  | Pathogenic (score: 0.88) |
| COSM520    | 10               | <i>KRAS</i>    | Pathogenic (score: 0.98) |
| COSM521    | 7                | <i>KRAS</i>    | Pathogenic (score: 0.98) |
| COSM1090   | 6                | <i>SMARCB1</i> |                          |
| COSM28026  | 5                | <i>KIT</i>     | Pathogenic (score: 0.74) |
| COSM518    | 4                | <i>KRAS</i>    | Pathogenic (score: 0.98) |
| COSM710    | 4                | <i>MET</i>     |                          |
| COSM5915   | 3                | <i>PTEN</i>    |                          |
| COSM12473  | 2                | <i>CDKN2A</i>  |                          |
| COSM21360  | 2                | <i>STK11</i>   |                          |
| COSM27895  | 2                | <i>GNAS</i>    |                          |
| COSM94388  | 2                | <i>GNAS</i>    |                          |
| NOCOSMIC10 | 2                | <i>IDH1</i>    |                          |

\*FATHMM: functional analysis through hidden Markov models

Supplementary Table S3. Predicted recurrent pathogenic COSMIC IDs from Taiwanese PAC assayed with the CHP (PAC: pancreatic adenocarcinoma, CHP: Cancer Hotspot Panel).

| Mutation ID | Gene Symbol   | Amino acid mutation                                | CDS mutation                                 |
|-------------|---------------|----------------------------------------------------|----------------------------------------------|
| COSM22413   | <i>PDGFRA</i> | p.V824= (Substitution - coding silent)             | c.2472C>T (Substitution, position 2472, C→T) |
| COSM520     | <i>KRAS</i>   | p.G12V (Substitution - Missense, position 12, G→V) | c.35G>T (Substitution, position 35, G→T)     |
| COSM521     | <i>KRAS</i>   | p.G12D (Substitution - Missense, position 12, G→D) | c.35G>A (Substitution, position 35, G→A)     |
| COSM518     | <i>KRAS</i>   | p.G12R (Substitution - Missense, position 12, G→R) | c.34G>C (Substitution, position 34, G→C)     |

Supplementary Table S4. Clinical and histological features of Taiwanese PAC patients assayed with the CHP (PAC: pancreatic adenocarcinoma, CHP Cancer Hotspot Panel).

| Sample | Sex | Histology | Grade | LVI* | PNI* | Pre-cancerous lesion<br>(if any) | Stage   | Mucin           |
|--------|-----|-----------|-------|------|------|----------------------------------|---------|-----------------|
| P48    | F   | Ductal    | 1     | LVI  | PNI  | PIN3                             | pT3N1M1 | mucin intensive |
| P50    | M   | Ductal    | 2     | LVI  | PNI  | PIN2                             | pT3N1   | mucin irregular |
| P53    | F   | Ductal    | 2     | LVI  | PNI  | PIN3                             | pT3N1   | mucin irregular |
| P55    | M   | Ductal    | 2     | LVI  | PNI  | PIN3                             | pT3N0   | mucin irregular |
| P56    | M   | Ductal    | 2     | LVI  | PNI  | PIN3                             | pT3N1   | mucin irregular |
| P57    | F   | Ductal    | 1     | LVI  | PNI  | PIN3                             | pT3N1   | mucin intensive |
| P58    | F   | Ductal    | 2     | LVI  | PNI  | PIN3                             | pT3N1   | mucin irregular |
| P60    | M   | Ductal    | 2     | LVI  | PNI  | PIN3                             | pT3N0   | mucin irregular |
| P64    | M   | Ductal    | 2     | LVI  | PNI  |                                  | pT3N1   |                 |
| P65    | M   | Ductal    | 3     | LVI  | PNI  | PIN                              | pT3N1M1 | mucin abortive  |
| P66    | F   | Ductal    | 2     | LVI  | PNI  | PIN3                             | pT3N1   | mucin irregular |
| P68    | M   | Ductal    | 2     | LVI  | PNI  | PIN3                             | pT3N1   | mucin irregular |
| P01    | F   | Ductal    | 3     | LVI  | no   |                                  | pT3N1   |                 |

|     |   |          |   |     |     |                          |       |                        |
|-----|---|----------|---|-----|-----|--------------------------|-------|------------------------|
| P06 | F | Ductal   | 1 | LVI | PNI | PIN3                     | pT3N1 |                        |
| P08 | M | Ductal   | 3 | LVI | PNI |                          | pT3N1 |                        |
| P09 | M | Ductal   | 2 | LVI | PNI |                          | pT3N1 |                        |
| P11 | F | Ductal   |   |     |     |                          |       |                        |
| P13 | F | Ductal   | 3 | LVI | PNI |                          | pT3N0 |                        |
| P14 | M | Ductal   | 2 | LVI | PNI |                          | pT3N1 |                        |
| P15 | F | Ductal   | 3 | LVI | PNI | IPMN                     | pT3N1 |                        |
| P18 | M | Ductal   | 3 | LVI | PNI |                          | pT3N0 | mucin focally positive |
| P20 | M | Ductal   | 2 | LVI | PNI |                          | pT3N1 | mucin irregular        |
| P22 | M | Ductal   | 2 | LVI | PNI |                          | pT3N0 | mucin irregular        |
| P24 | M | Invasive | 1 | LVI | PNI | Mucinous cystic neoplasm | pT3N0 |                        |
| P27 | F | Ductal   | 2 | LVI | PNI |                          | pT3N1 | mucin irregular        |
| P29 | M | Ductal   | 2 | LVI | PNI |                          | pT3N1 |                        |
| P32 | F | Ductal   | 2 | LVI | PNI |                          | pT3N1 | mucin irregular        |
| P33 | M | Ductal   | 3 | LVI | PNI | IS                       | pT3N1 | mucin irregular        |
| P35 | F | Ductal   | 3 | LVI | PNI |                          | pT3N1 |                        |

|     |   |                         |   |     |     |      |         |                  |
|-----|---|-------------------------|---|-----|-----|------|---------|------------------|
| P37 | F | Ductal                  | 3 | LVI | PNI | PIN  | pT3N1   | mucin abortive   |
| P38 | M | Colloid                 | 2 | LVI | PNI |      | pT3N1   | mucin marked     |
| P39 | M | Ductal                  | 3 | LVI | PNI |      | pT3N0   |                  |
| P40 | M | Ductal                  | 3 | LVI | PNI |      | pT3N1   |                  |
| P41 | M | Ductal                  | 2 | LVI | PNI | PIN3 | pT3N1   |                  |
| P43 | F | Ductal                  | 2 | LVI | PNI | PIN  | pT3N1   |                  |
| P44 | M | Undifferentiated+ductal | 4 | LVI | PNI | PIN3 | pT3N1M1 |                  |
| P45 | M | Ductal                  | 2 | LVI | PNI |      | pT3N1   |                  |
| P46 | M | Ductal                  | 2 | LVI | PNI |      | pT3N1   | mucin occasional |

(\*LVI: lympho-vascular invasion, PNI: peri-neural invasion)
